# Supplementary material
Source: PubMed Central journal article supplement (PMC6440720)
Supplement: jamaoncol-4-1707-s002.pdf [file jamaoncol-4-1707-s002.pdf]

## Supplementary Online Content

Sahai V, Catalano PJ, Zalupski MM, et al. Nab-paclitaxel and gemcitabine as first-line treatment of advanced or metastatic cholangiocarcinoma: a phase 2 clinical trial. *JAMA Oncol*. Published online August 30, 2018. doi:10.1001/jamaoncol.2018.3277

**eTable.** Treatment-Related Adverse Events ( $\geq 10\%$  Frequency)

**eFigure.** Kaplan-Meier Curves for (A) Progression-Free Survival and (B) Overall Survival by Decline in CA19-9 (<50% vs  $\geq 50\%$ )

This supplementary material has been provided by the authors to give readers additional information about their work.

**eTable. Treatment-Related Adverse Events (≥10% Frequency)**

| <b>Event</b>                                        | <b>N</b> | <b>%</b> |
|-----------------------------------------------------|----------|----------|
| Patients with ≥1 TRAE                               | 72       | 97.3     |
| <b>Hematologic events</b>                           |          |          |
| Neutropenia                                         | 40       | 67.6     |
| Anemia                                              | 29       | 39.2     |
| Thrombocytopenia                                    | 16       | 21.6     |
| Leukopenia                                          | 15       | 20.3     |
| <b>Non-hematologic events</b>                       |          |          |
| Fatigue                                             | 52       | 70.3     |
| Peripheral neuropathy                               | 41       | 55.4     |
| Alopecia                                            | 38       | 51.4     |
| Nausea                                              | 33       | 44.6     |
| Peripheral edema                                    | 32       | 42.2     |
| Diarrhea                                            | 28       | 37.8     |
| Decreased appetite                                  | 25       | 33.8     |
| Constipation                                        | 18       | 24.3     |
| Vomiting                                            | 16       | 21.6     |
| Pyrexia                                             | 14       | 18.9     |
| Dysgeusia                                           | 14       | 18.9     |
| Weight loss                                         | 12       | 16.2     |
| Muscular weakness                                   | 11       | 14.9     |
| Dyspnea                                             | 10       | 13.5     |
| Elevated blood alkaline phosphatase level           | 10       | 13.5     |
| Elevated alanine aminotransferase level             | 9        | 12.2     |
| Elevated aspartate aminotransferase level           | 9        | 12.2     |
| Arthralgia                                          | 8        | 10.8     |
| Chills                                              | 8        | 10.8     |
| Stomatitis                                          | 8        | 10.8     |
| Abbreviation: TRAE, treatment-related adverse event |          |          |

**eFigure. Kaplan-Meier Curves for (A) Progression-Free Survival and (B) Overall Survival by Decline in CA19-9 (<50% vs ≥50%)**

**A**

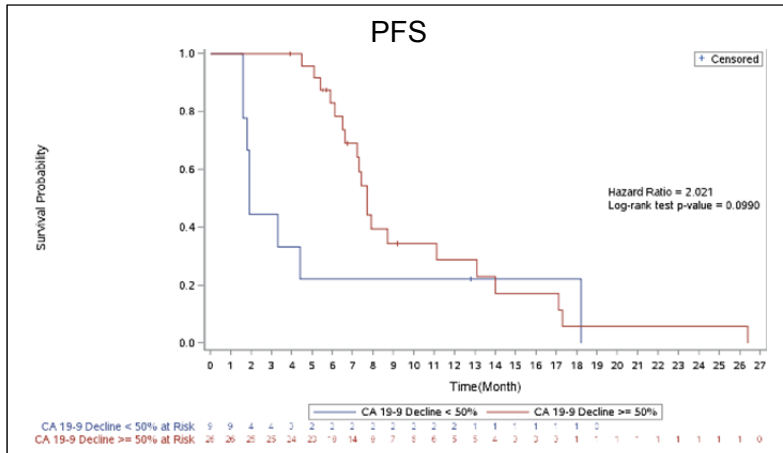

**B**

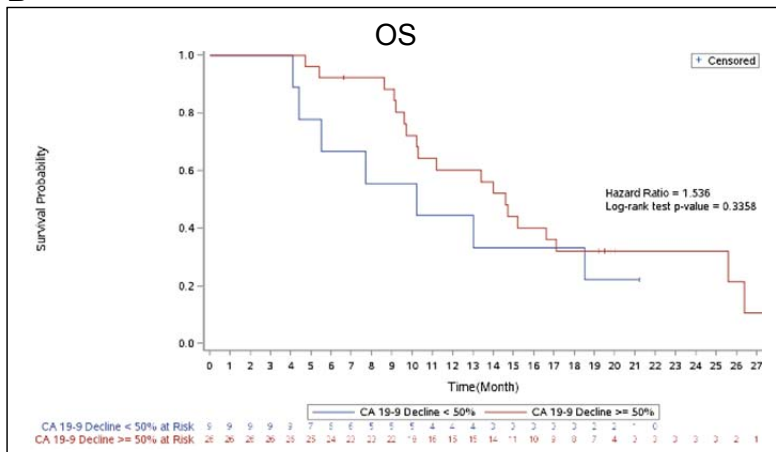

CA, carbohydrate antigen; OS, overall survival, PFS, progression-free survival
